# Supplementary material
Source: Elsevier journal article supplement (https://publikationen.ub.uni-frankfurt.de/files/43173/mmc1.pdf)
Supplement: mmc1 [file mmc1.pdf]

## **Supplemental Information**

### **Potent Anti-seizure Effects of Locked Nucleic**

### **Acid Antagomirs Targeting miR-134**

### **in Multiple Mouse and Rat Models of Epilepsy**

**Cristina R. Reschke, Luiz F. Almeida Silva, Braxton A. Norwood, Ketharini Senthilkumar, Gareth Morris, Amaya Sanz-Rodriguez, Ronán M. Conroy, Lara Costard, Valentin Neubert, Sebastian Bauer, Michael A. Farrell, Donncha F. O'Brien, Norman Delanty, Stephanie Schorge, R. Jeroen Pasterkamp, Felix Rosenow, and David C. Henshall**

## Supplemental Information

**Supplemental Table S1** Autopsy control details

| Identifier | Gender | Age (y) | Tissue      | Cause of death                                       | PMI (h) |
|------------|--------|---------|-------------|------------------------------------------------------|---------|
| C1         | F      | 24      | Hippocampus | Accident, Head injuries                              | 7       |
| C2         | F      | 42      | Hippocampus | Hypertensive Arteriosclerotic Cardiovascular Disease | 4       |
| C3         | M      | 32      | Hippocampus | Morphine intoxication                                | 7       |
| C4         | M      | 41      | Hippocampus | Undetermined, history of heart problems              | 6       |
| C5         | M      | 29      | Hippocampus | Acute pancreatitis                                   | 8       |
| C6         | F      | 35      | Hippocampus | Accident, Multiple injuries                          | 2       |
| C7         | M      | 40      | Hippocampus | Hemopericardium / Aortic Dissection                  | 9       |
| C8         | M      | 39      | Hippocampus | Hemopericardium                                      | 16      |
| C9         | M      | 50      | Hippocampus | Acute alcohol intoxication                           | 19      |
| C10        | F      | 46      | Hippocampus | Hypertensive Atherosclerosis Heart Disease           | 18      |
| C11        | F      | 37      | Hippocampus | Asthma                                               | 16      |
| C12        | F      | 42      | Hippocampus | Cardiac Arrhythmia                                   | 12      |

Key: F, female; h, hours; M, male; PMI, post-mortem interval; y, years

**Supplemental Table S2** Epilepsy patient details

| Identifier | Gender | Age (y) | Tissue      | Diagnosis and other pathology findings |
|------------|--------|---------|-------------|----------------------------------------|
| E1         | M      | 30      | Hippocampus | Hippocampal Sclerosis                  |
| E2         | F      | 33      | Hippocampus | Mesial temporal sclerosis mild         |
| E3         | F      | 49      | Hippocampus | Mesial hippocampal sclerosis mild      |
| E4         | F      | 40      | Hippocampus | Mesial temporal sclerosis mild         |
| E5         | M      | 43      | Hippocampus | Hippocampal gliosis                    |
| E6         | M      | 46      | Hippocampus | Minimal hipo gliosis                   |
| E7         | F      | 18      | Hippocampus | Mesial temporal sclerosis mild         |
| E8         | M      | 19      | Hippocampus | Gliosis                                |
| E9         | M      | 40      | Hippocampus | Astrocytosis no inflammation           |
| E10        | F      | 38      | Hippocampus | Mesial sclerosis moderate              |
| E11        | F      | 33      | Hippocampus | Gliosis minimal, neuronal loss         |
| E12        | F      | 54      | Hippocampus | Mesial temporal sclerosis severe       |

Key: F, female; M, male; y, years
